# Supplementary material for: Using a Modified Delphi Approach to Gain Consensus on Relevant Comparators in a Cost-Effectiveness Model: Application to Prostate Cancer Screening
Source: PubMed Central journal article supplement — Pharmacoeconomics. 2021 Apr 2;39(5):589–600. doi: 10.1007/s40273-021-01009-6 (PMC8079293; doi:10.1007/s40273-021-01009-6), 2021-04-02
Supplement: 40273_2021_1009_MOESM3_ESM.pdf [file 40273_2021_1009_MOESM3_ESM.pdf]

# Gaining consensus on prostate cancer screening strategies

Please complete the survey below.

Thank you!

Response was added on 11-02-2020 16:46.

What is your email address? x@ymail.com

What is your age range?

- ☐ 18-24
- ☐ 25-34
- ☐ 35-44
- ☒ 45-54
- ☐ 55-64
- ☐ 65-74
- ☐ 75+

How many years have you been working in your field?

- ☐ 1-5
- ☐ 5-10
- ☒ 10-15
- ☐ 15-20
- ☐ 20+

What is your clinical focus?

- ☐ Oncology
- ☒ Urology
- ☐ General practice
- ☐ Other

In what country are you based? UK

1a. What type of prostate cancer screening programme do you feel should be provided in the UK?

Note: Age-based implies that an invitation to screening will depend on age alone. Risk-based implies that an invitation will depend on both age and level of risk.

- ☐ No screening
- ☐ Opportunistic screening
- ☒ Organised screening - Age-based
- ☐ Organised screening - Risk-based
- ☐ Other

1b. Comments on this question/Reason for your answer

2a. If age-based screening were to be provided at what age should a man's baseline PSA level should be taken?

- ☐ 40
- ☐ 45
- ☒ 50
- ☐ 55
- ☐ 60
- ☐ Other

2b. Comments on this question/Reason for your answer

3a. If age-based screening were to be provided at what age should screening end?

- ☐ 70
- ☒ 75
- ☐ 80
- ☐ Other

3b. Comments on this question/Reason for your answer

9a. Which PSA threshold do you think should be used to indicate further investigation?

- ☒ 3 ng/ml
- ☐ 4 ng/ml
- ☐ 5 ng/ml
- ☐ 6 ng/ml
- ☐ 7 ng/ml
- ☐ 8.5 ng/ml
- ☐ 10 ng/ml
- ☐ This should be based on age
- ☐ Other

9b. Comments on this question/Reason for your answer

10a. Assuming some optimal strategy for inviting men to be screened has been adopted, how frequently do you think men should be screened?

- ☐ every 10 years
- ☐ every 6 years
- ☐ every 4 years
- ☒ every 2 years
- ☐ annually
- ☐ only once
- ☐ This should be based on PSA level
- ☐ Other

---

10b. Comments on this question/Reason for your answer

---

---

11a. What further investigation should men with a raised PSA level have prior to being offered a biopsy?

- ☐ no further investigation
  - ☐ Digital Rectal Examination (DRE)
  - ☒ multi-kallikrein panel (e.g. 4k score, STHLM3)
  - ☐ PSA density
  - ☐ % free PSA
  - ☒ multiparametric MRI (mpMRI)
  - ☐ other
- 

11b. Comments on this question/Reason for your answer

---

---

12a. What is the main factor you would consider in your decision on whether or not a screening programme should be introduced?

- ☐ false findings
  - ☐ reducing death from prostate cancer
  - ☐ quality of life
  - ☐ complications
  - ☐ workforce capacity
  - ☐ financial resources
  - ☐ cost of testing
  - ☒ cost-effectiveness of screening
  - ☐ other
- 

12b. Comments on this question/Reason for your answer

---

---

Your preferred screening strategy is

Organised screening - Age-based

---

In men aged 50 to 75.

---

The PSA threshold for further investigation should be 3 ng/ml.

---

Men should be screened every 2 years.

---

Men with a raised PSA should be tested using multi-kallikrein panel (e.g. 4k score, STHLM3), multiparametric MRI (mpMRI) prior to biopsy.

---

The main factor you would consider in your decision to screen is cost-effectiveness of screening.

---
